# Supplementary material
Source: Springer Nature journal article supplement (https://www.springermedizin.de/resource/supplementary/13098_2013_300_MOESM7_ESM.pdf/9671016)

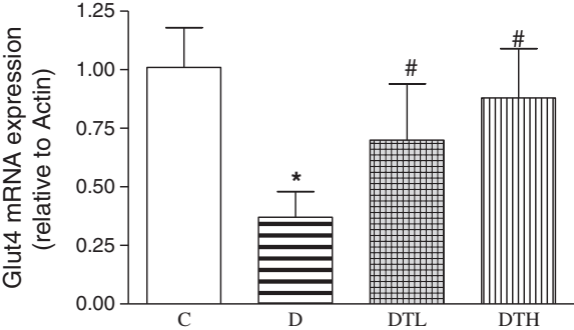

Supplement: MOESM7 [file 9671016]
